# Supplementary material for: Genome-wide association studies of lifetime and frequency cannabis use in 131,895 individuals
Source: bioRxiv or medRxiv preprint supplement (doi:10.1101/2024.06.14.24308946), 2024-06-15
Supplement: Supplementary file [file media-1.pdf]

1 **Supplementary Information**

2 **Genome-wide association studies of lifetime and frequency cannabis use in 131,895**  
3 **individuals**

4  
5 Hayley H A Thorpe, PhD<sup>1</sup>, Pierre Fontanillas, PhD<sup>2</sup>, John J Meredith, BSc<sup>3</sup>, Mariela V Jennings,  
6 BSc<sup>3</sup>, Renata B Cupertino, PhD<sup>3</sup>, Shreya Pakala, BSc<sup>3</sup>, 23andMe Research Team<sup>2</sup>, Sarah L  
7 Elson, PhD<sup>2</sup>, Jibrán Y Khokhar, PhD<sup>1</sup>, Lea K Davis<sup>4,5,6</sup>, PhD, Emma C Johnson, PhD<sup>7</sup>, Abraham  
8 A Palmer, PhD<sup>3,8</sup>, & Sandra Sanchez-Roige, PhD<sup>3,5,8\*</sup>

9 <sup>1</sup>Department of Anatomy and Cell Biology, Schulich School of Medicine and Dentistry, Western  
10 University, London, ON, Canada.

11 <sup>2</sup>23andMe, Inc., Sunnyvale, CA, USA

12 <sup>3</sup>Department of Psychiatry, University of California San Diego, La Jolla, CA, USA

13 <sup>4</sup>Department of Biomedical Informatics, Vanderbilt University Medical Center, Nashville, TN,  
14 USA

15 <sup>5</sup>Department of Medicine, Vanderbilt University Medical Center, Nashville, TN, USA

16 <sup>6</sup>Department of Psychiatry and Behavioral Sciences, Vanderbilt University Medical Center,  
17 Nashville, TN, USA

18 <sup>7</sup>Department of Psychiatry, Washington University School of Medicine, St. Louis, MO USA

19 <sup>8</sup>Institute for Genomic Medicine, University of California San Diego, La Jolla, CA, USA

20  
21 **Corresponding Author:**

22 Sandra Sanchez-Roige, PhD

23 Department of Psychiatry, University of California San Diego

24 9500 Gilman Drive, La Jolla, CA, USA, 92093

25 Phone: +1-619-874-1426

26 Email: [sanchezroige@ucsd.edu](mailto:sanchezroige@ucsd.edu)

27 **Supplementary Methods**

28 **Analysis of local ancestry**

29 We performed lifetime cannabis use GWAS ( $N=131,895$ ) and frequency of cannabis use  
30 GWAS ( $N=73,374$ ) on 23andMe, Inc. participants classified as being of European ancestry.  
31 Ancestry falls along a spectrum<sup>1,2</sup>; each individual was clustered based on genetic similarity to a  
32 reference panel using local ancestry analysis<sup>3</sup>. Briefly, the 23andMe algorithm first partitions  
33 phased genomic data into short windows of about 300 SNPs. Within each window, we use a  
34 support vector machine to classify individual haplotypes into one of 31 reference populations  
35 (<https://www.23andme.com/ancestry-composition-guide/>). The support vector machine  
36 classifications are fed into a hidden Markov model that accounts for switch errors and incorrect  
37 assignments, and gives probabilities for each reference population in each window. The reference  
38 population data is derived from public datasets (the Human Genome Diversity Project, HapMap,  
39 and 1000 Genomes), as well as 23andMe customers who have reported having four grandparents  
40 from the same country.

41 Ancestries are defined as follows:

| Ancestry                          | Classification Criteria                                                                                     |
|-----------------------------------|-------------------------------------------------------------------------------------------------------------|
| European                          | European + Middle Eastern > 0.97, European > 0.90                                                           |
| East Asian                        | East Asian + Southeast Asian > 0.97                                                                         |
| South Asian                       | South Asian > 0.97                                                                                          |
| Middle Eastern (& North African)  | Middle Eastern + European > 0.97, Middle Eastern > 0.90                                                     |
| African American + Latin American | European + African + East Asian + Native American + Middle Eastern > 0.90, African + Native American > 0.01 |

## 42 **Genome-wide association and secondary analyses**

43 DNA extraction and genotyping were performed from saliva samples by clinical  
44 laboratories CLIA-certified and CAP-accredited by the Laboratory Corporation of America.  
45 23andMe, Inc. conducted all quality control, imputation, and univariate genome-wide analyses as  
46 previously described (see **Supplementary Table 3** for SNPs analyzed following quality control  
47 and imputation)<sup>4,5</sup>. Participants were genotyped on one of five Illumina genotyping platforms,  
48 containing between 550,000 to 950,000 variants, for a total of 1.6 million genotyped variants.  
49 Samples were genotyped on one of five genotyping platforms. The V1 and V2 platforms were  
50 variants of the Illumina HumanHap550 + BeadChip, including about 25,000 custom SNPs  
51 selected by 23andMe, with a total of ~560,000 SNPs. The V3 platform was based on the Illumina  
52 OmniExpress + BeadChip, with custom content to improve the overlap with our V2 array, with a  
53 total of ~950,000 SNPs. The V4 platform is a fully custom array, including a lower redundancy  
54 subset of V2 and V3 SNPs with additional coverage of lower-frequency coding variation, and  
55 ~570,000 SNPs. The v5 platform, in current use, is an Illumina Infinium Global Screening Array  
56 (~640,000 variants) supplemented with ~50,000 variants of custom content. Samples that failed  
57 to reach 98.5% call rate were excluded from the study. Samples that failed to reach 98.5% call  
58 rate were re-analyzed<sup>6,7</sup>. Variants were imputed based on an imputation panel combining 1000  
59 Genomes Phase 3, UK10K and the Human Reference Consortium (**HRC**). About 64.4 million  
60 variants were then imputed against the HRC panel, augmented by a single unified imputation  
61 reference panel combining the May 2015 release of the 1000 Genomes Phase 3 haplotypes with  
62 the UK10K imputation reference panel for variants not present in the HRC. Imputed variants with  
63 low imputation quality ( $r^2 < 0.50$  averaged across batches or a minimum  $r^2 < 0.30$ ), or with evidence  
64 of batch effects ( $p < 1.00E-50$ ) were removed<sup>6,7</sup>. A total of 1.3 million genotyped and 30.5 million  
65 imputed variants passed the pre- and post-GWAS quality controls. We furthermore filtered out  
66 variants with minor allele frequency (**MAF**)  $< 0.1\%$ , which are extremely sensitive to quantitative  
67 trait over-dispersion, reducing to 14.1 million variants available for follow-up analyses. Principal

68 components were computed using ~65,000 high-quality genotyped variants present in all five  
69 genotyping platforms.

70 A maximal set of unrelated individuals was chosen for the analysis using a segmental  
71 identity-by-descent (**IBD**) estimation algorithm<sup>8</sup> to ensure that only unrelated individuals were  
72 included in the sample. Individuals were defined as related if they shared more than 700 cM IBD,  
73 including regions where the two individuals shared either one or both genomic segments IBD.  
74 This level of relatedness (~20% of the genome) corresponds to approximately the minimal  
75 expected sharing between first cousins in an outbred population. For the lifetime cannabis use  
76 binary phenotype, if a case was found to be related to a control, the case was preferentially kept  
77 in the sample. The 23andMe GWAS pipeline performs linear regression and assumes an additive  
78 model for allelic effects<sup>9-12</sup>. Age (inverse-normal transformed), sex, the top five principal genotype  
79 components, and indicator variables for genotype platforms were applied as covariates and *p*-  
80 values were corrected for genomic control. We imputed participant genotype data against the  
81 September 2013 release of 1000 Genomes phase 1 version 3 reference haplotypes. We phased  
82 and imputed data for each genotyping platform separately. We phased using an internally  
83 developed phasing tool, Finch, which implements the Beagle haplotype graph-based phasing  
84 algorithm, modified to separate the haplotype graph construction and phasing steps. In  
85 preparation for imputation, we split phased chromosomes into segments of no more than 10,000  
86 genotyped SNPs, with overlaps of 200 SNPs. We excluded SNPs of low genotyping quality,  
87 including those that failed a Mendelian transmission test in trios ( $p < 1.00E-20$ ) or with large allele  
88 frequency discrepancies compared to European 1000 Genomes reference data, failed Hardy-  
89 Weinberg test ( $p < 1.00E-20$ ), failed batch effects test (ANOVA  $p < 1.00E-20$ ), or had a call rate  
90 <90%. Frequency discrepancies were identified by computing a 2 x 2 table of allele counts for  
91 European 1000 Genomes samples and 2000 randomly sampled 23andMe research participants  
92 with European ancestries, and identifying SNPs with a  $\chi^2$   $p < 10E-15$ . We imputed each phased

93 segment against all-ethnicity 1000 Genomes haplotypes (excluding monomorphic and singleton  
94 sites) using Minimac2<sup>13</sup>, using 5 rounds and 200 states for parameter estimation.

95 For the X chromosome, we built separate haplotype graphs for the non-pseudoautosomal  
96 region and each pseudoautosomal region, and these regions were phased separately. We then  
97 imputed males and females together using Minimac2, as with the autosomes, treating males as  
98 homozygous pseudo-diploids for the non-pseudoautosomal region.

99 For tests using imputed data, we use the imputed dosages rather than best-guess  
100 genotypes. We imputed HLA allele dosages from SNP genotype data using HIBAG. We imputed  
101 alleles for HLA-A, B, C, DPB1, DQA1, DQB1, and DRB1 loci at four-digit resolution. To test  
102 associations between HLA allele dosages and phenotypes, we performed linear regression using  
103 the same set of covariates used in the SNP based GWAS. We performed separate association  
104 tests for each imputed allele. HLA analysis did not identify any significant signal and hence are  
105 not described in the main text.

#### 106 **Genetic correlation, PheWAS, and LabWAS traits**

107 Genetic correlations were conducted using a set of 292 summary statistics across 22  
108 health, psychiatric, and anthropomorphic categories. Summary statistics related to health  
109 included 21 cancer, 16 cardiovascular, 10 immune & inflammation, 10 metabolic, 9  
110 gastrointestinal, 8 neurological, 6 pain, and 15 other health traits. Summary statistics related to  
111 psychiatric health included 39 substance use & misuse, 23 anxiety & stress disorder, 23 bipolar  
112 & depression, 12 cognitive & executive function, 8 psychosis, 4 suicide, and 17 other psychiatric  
113 traits. Summary statistics related to anthropologic characteristics included 28 personality, 16  
114 lifestyle/events, 7 diet, 7 physical, 6 sleep, 4 neuroimaging, and 3 longevity traits.

115 Following exclusion of phecodes with insufficient data, we retained 1,405 phenotypes for  
116 the PheWAS analysis. Disease phenotypes included 149 circulatory system, 131 digestive, 129  
117 genitourinary, 123 endocrine/metabolic, 120 neoplasms, 96 musculoskeletal, 92 sense organs,  
118 77 injuries & poisonings, 77 respiratory, 72 dermatological, 71 neurological, 70 psychiatric

119 disorders, 47 infectious diseases, 45 hematopoietic, 36 symptoms, 35 congenital anomalies, and  
 120 35 pregnancy complications.

121 We explored associations with cannabis PGS using 314 LabWAS phenotypes. LabWAS  
 122 phenotypes included 74 immune, 68 metabolic, 56 blood, 24 cardiovascular, 23 urinary, 20  
 123 endocrine, 16 toxicology/pharmacology, 14 other, 6 cancer, 6 kidney, 6 liver, and 1 OB/GYN.

124 **Polygenic Score Prediction in *All of Us***

125 The following concept ID codes available in *All of Us* (AoU) were used to create cohorts  
 126 of participants with cannabis use traits of interest:

| Concept ID(s)                   | Question/Criteria                                                                                                                      |
|---------------------------------|----------------------------------------------------------------------------------------------------------------------------------------|
| <i>Lifetime Cannabis Use</i>    |                                                                                                                                        |
| 1585636                         | Answered MARIJUANA to the question "In your LIFETIME, which of the following substances have you ever used?"                           |
| <i>Daily Cannabis Use</i>       |                                                                                                                                        |
| 1585650                         | Answered DAILY to the question "In the PAST THREE MONTHS, how often have you used Marijuana (cannabis, pot, grass, hash, weed, etc.)?" |
| <i>Problematic Cannabis Use</i> |                                                                                                                                        |
| 434327                          | Cannabis abuse EHR                                                                                                                     |
| 440387                          | Cannabis dependence EHR                                                                                                                |
| 440996                          | Cannabis dependence in remission EHR                                                                                                   |
| 433452                          | Cannabis dependence, continuous EHR                                                                                                    |
| 437838                          | Cannabis dependence, episodic EHR                                                                                                      |
| 4323639                         | Cannabis misuse EHR                                                                                                                    |
| 4103419                         | Nondependent cannabis abuse EHR                                                                                                        |
| 435231                          | Nondependent cannabis abuse in remission EHR                                                                                           |
| 434019                          | Nondependent cannabis abuse, continuous EHR                                                                                            |
| 434328                          | Nondependent cannabis abuse, episodic EHR                                                                                              |

127 To calculate liability scale  $R^2$  estimates for polygenic prediction based on Lee et al. <sup>14</sup>, the  
 128 estimated prevalence of cannabis use traits in the US population was obtained from the literature  
 129 for individuals over 18 years old.

| Trait                                            | Estimate (%) | Criteria                                                                                                                                                                                   |
|--------------------------------------------------|--------------|--------------------------------------------------------------------------------------------------------------------------------------------------------------------------------------------|
| Lifetime cannabis use <sup>15</sup>              | 50.30        | Answering yes to the question "Have you ever, even once, used marijuana or any cannabis product?" in the National Survey on Drug Use and Health Survey                                     |
| Daily or almost daily cannabis use <sup>15</sup> | 25.10        | Reporting using marijuana on $\geq 20$ days in the past month in the National Survey on Drug Use and Health Survey                                                                         |
| DSM-5 CUD <sup>16</sup>                          | 6.27         | $\geq 2$ out of 11 diagnostic criteria within a 12-month period in the, aggregated with prior diagnosis history in the National Epidemiologic Survey on Alcohol and Related Conditions-III |

130

131 **Supplementary Figures**

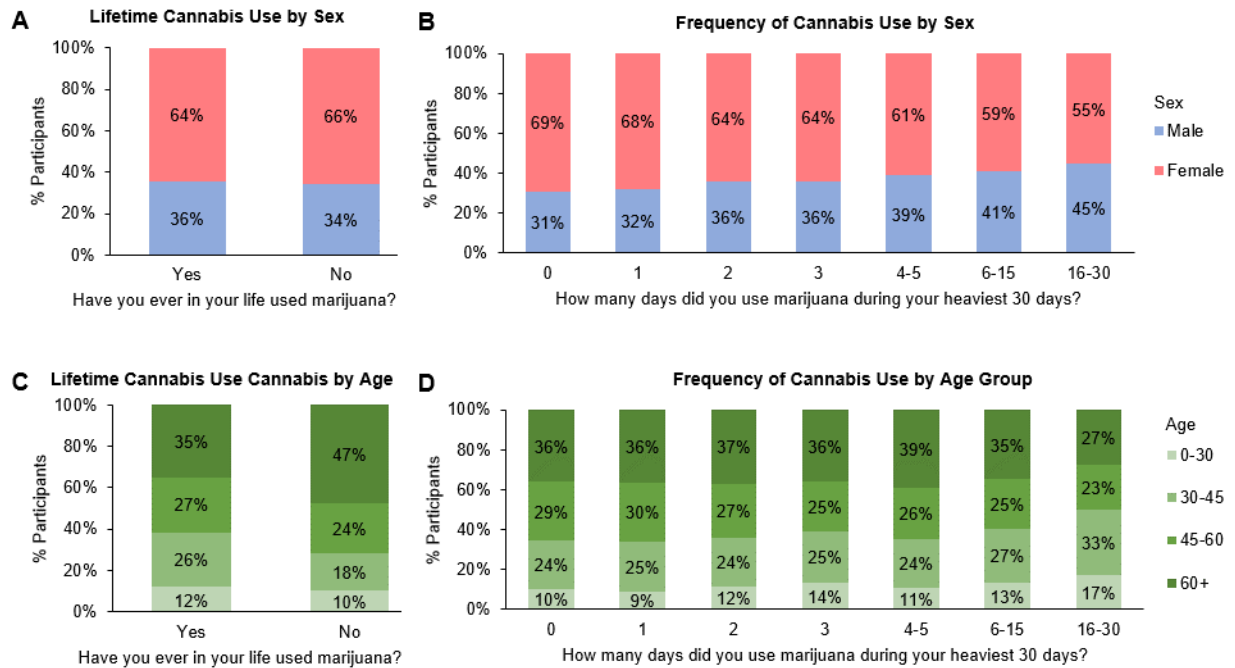

132  
 133 **Supplementary Figure 1.** Participant cannabis use by sex and age group. **A)** Proportion of  
 134 reported lifetime cannabis use by sex. **B)** Proportion of frequency of cannabis use by sex. **C)**  
 135 Proportion of reported lifetime cannabis use by age groups. **D)** Proportion of reported frequency  
 136 of cannabis use by age group.

137



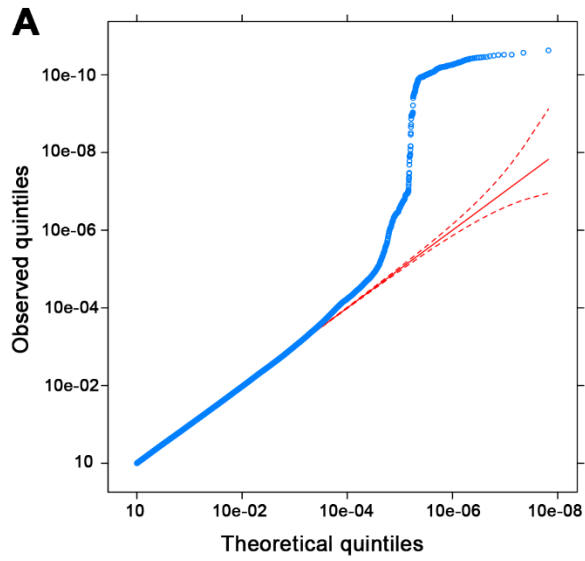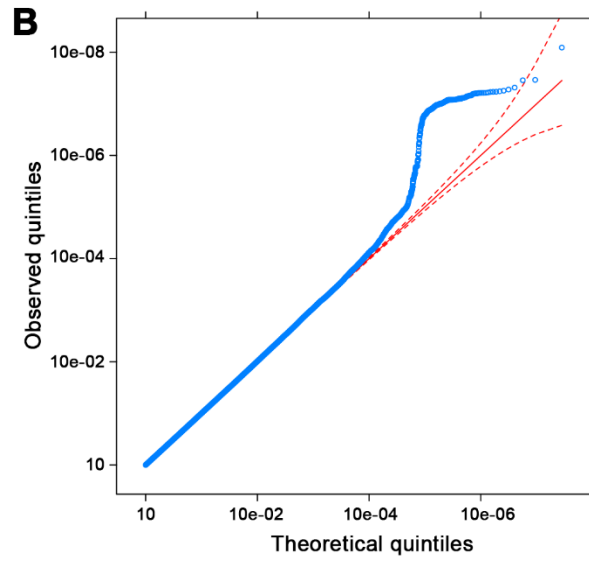

138

139 **Supplementary Figure 2.** Q-Q plots for **A)** lifetime cannabis use and **B)** frequency of cannabis  
 140 use.

141

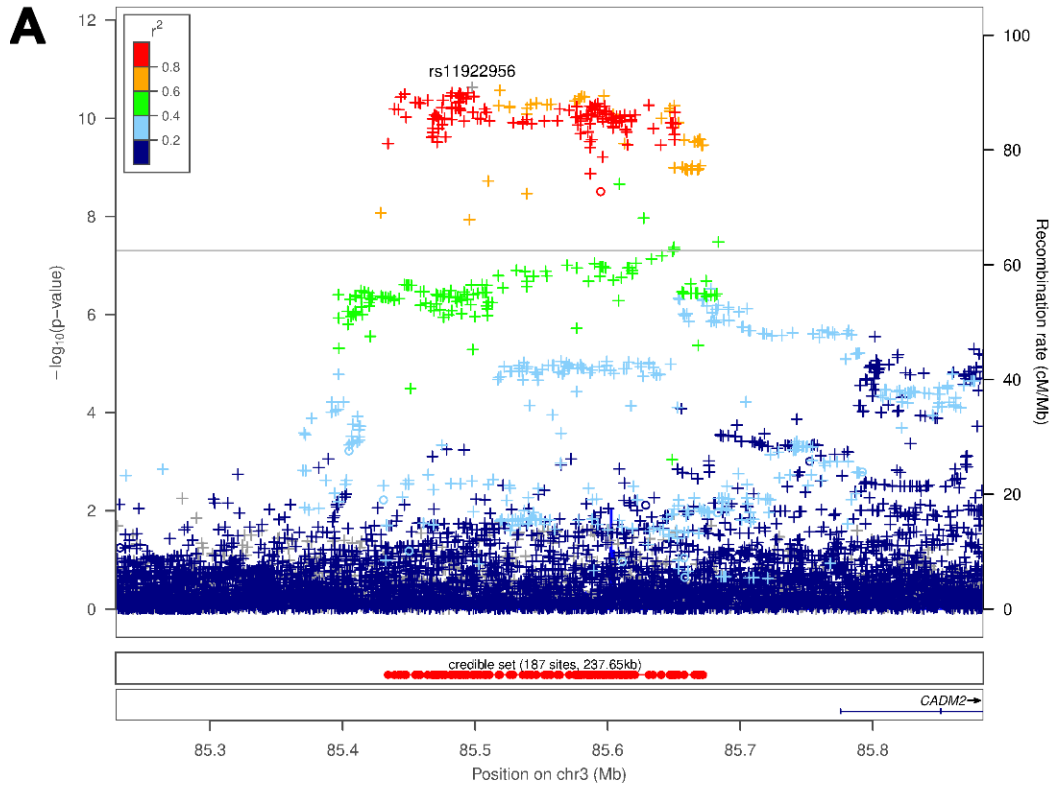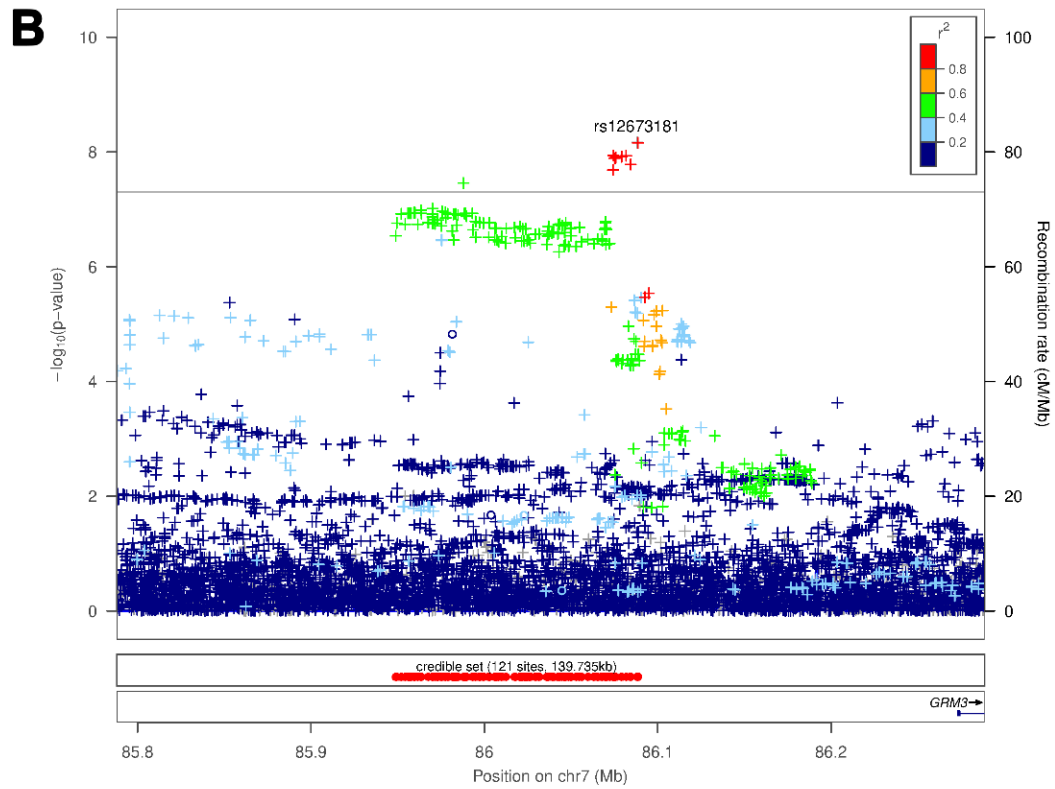

143 **Supplementary Figure 3.** Locus zoom plot focusing on SNP **A)** rs11922956 on chromosome 3  
144 and **B)** rs12673181 on chromosome 7. These plots were generated using LocusZoom <sup>17</sup>. The -  
145  $\log_{10}(\rho\text{-value})$  is shown on the left y-axis; position in Mb is on the x-axis. Recombination rates  
146 (expressed in centiMorgans cM per Mb; NCBI Build GRCh37; highlighted in blue) are shown on  
147 the right y-axis. Pairwise linkage disequilibrium ( $r^2$ ) of each SNP with the top SNP in the region is  
148 indicated by its color. Crossed points represent imputed SNPs, circles represent directly  
149 genotyped SNPs.

150

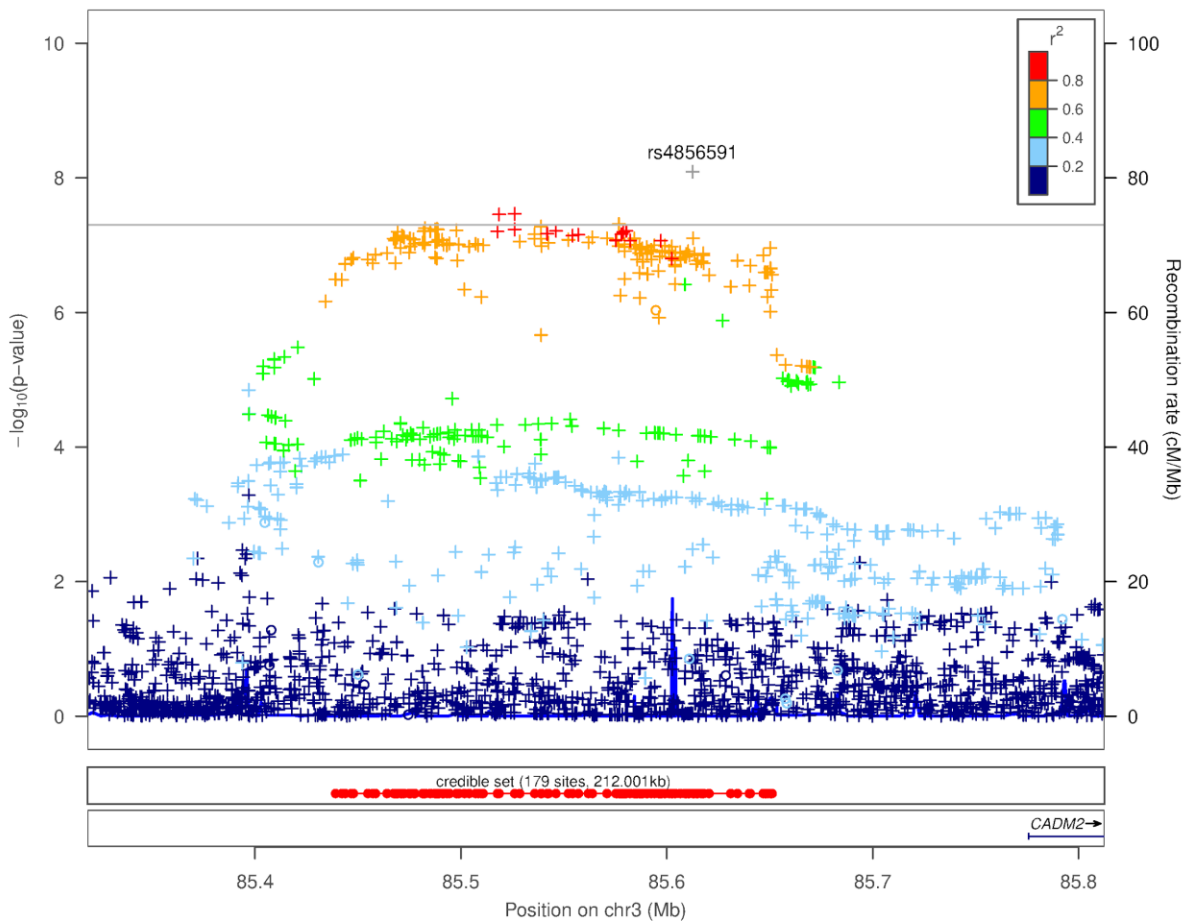

151

152 **Supplementary Figure 4.** Locus zoom plot focusing on SNP rs4856591 on chromosome 3. This  
 153 plot was generated using LocusZoom<sup>17</sup>. The  $-\log_{10}(p\text{-value})$  is shown on the left y-axis; position  
 154 in Mb is on the x-axis. Recombination rates (expressed in centiMorgans cM per Mb; NCBI Build  
 155 GRCh37; highlighted in blue) are shown on the right y-axis. Pairwise linkage disequilibrium ( $r^2$ ) of  
 156 each SNP with the top SNP in the region is indicated by its color. Crossed points represent  
 157 imputed SNPs, circles represent directly genotyped SNPs.

158

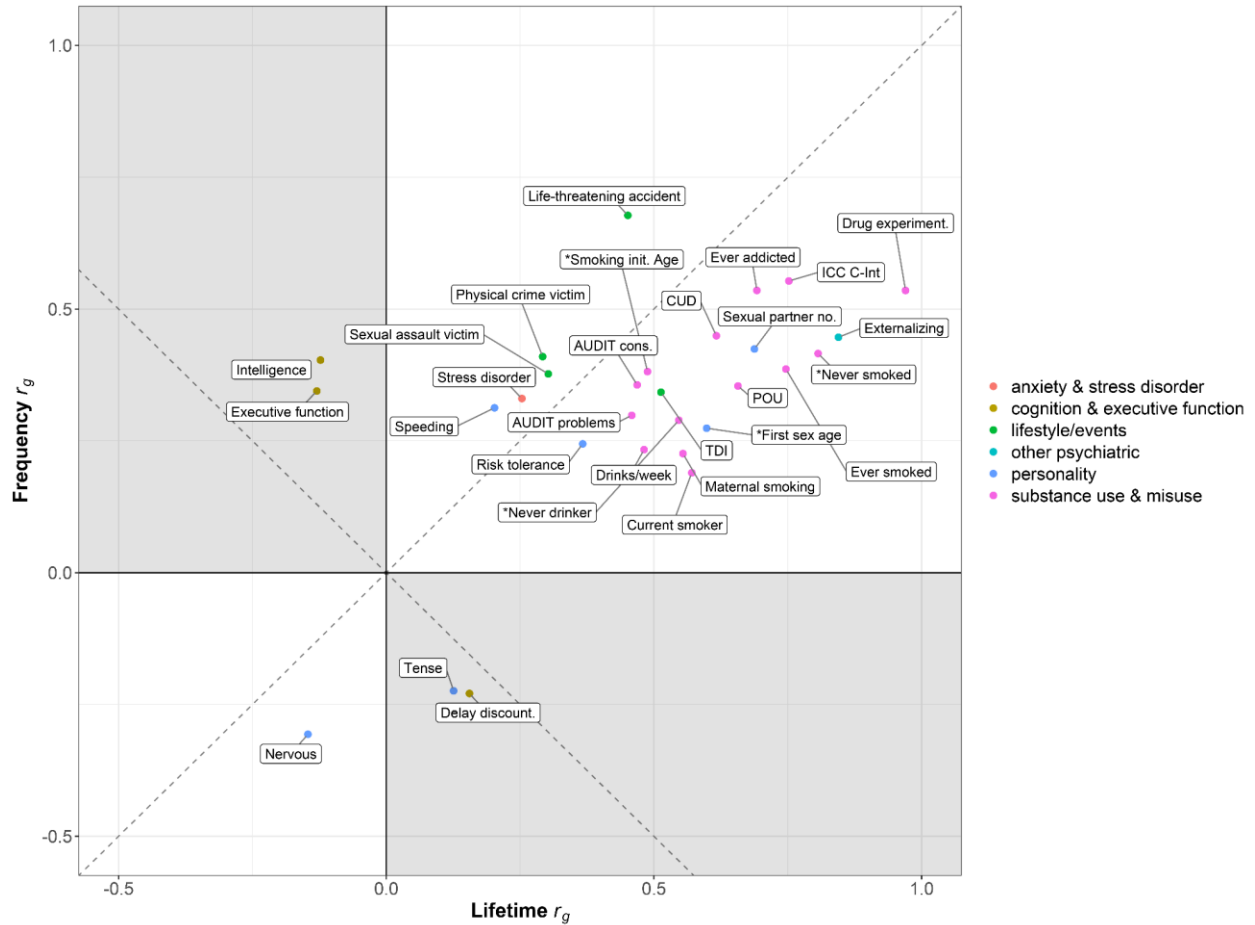

159

160 **Supplementary Figure 5.** Comparison of shared FDR-significant genetic correlations between  
 161 lifetime cannabis use and frequency of cannabis use. Traits with discordant genetic correlation  
 162 directions of effect located in gray quadrants. Dotted lines represent point of full linearity  
 163 between lifetime and frequency of cannabis use. \*reverse coded traits.

164

165

166

167

168 **References**

- 169 1. Bryc, K., Durand, E.Y., Macpherson, J.M., Reich, D., and Mountain, J.L. (2015). The  
170 genetic ancestry of African Americans, Latinos, and European Americans across the  
171 United States. *Am J Hum Genet* 96, 37-53. 10.1016/j.ajhg.2014.11.010.
- 172 2. National Academies of Sciences, Engineering, and Medicine Health and Medicine  
173 Division, Division of Behavioral and Social Sciences and Education, Board on Health  
174 Sciences Policy, Committee on Population, Committee on the Use of Race, and  
175 Ethnicity, and Ancestry as Population Descriptors in Genomics Research (2023). In  
176 Using Population Descriptors in Genetics and Genomics Research: A New Framework  
177 for an Evolving Field. 10.17226/26902.
- 178 3. Durand, E.Y., Do, C.B., Mountain, J.L., and Macpherson, J.M. (2014). Ancestry  
179 Composition: A Novel, Efficient Pipeline for Ancestry Deconvolution. *bioRxiv*. [Preprint].  
180 10.1101/010512.
- 181 4. Eriksson, N., Macpherson, J.M., Tung, J.Y., Hon, L.S., Naughton, B., Saxonov, S., Avey,  
182 L., Wojcicki, A., Pe'er, I., and Mountain, J. (2010). Web-based, participant-driven studies  
183 yield novel genetic associations for common traits. *PLoS Genet* 6, e1000993.  
184 10.1371/journal.pgen.1000993.
- 185 5. Hyde, C.L., Nagle, M.W., Tian, C., Chen, X., Paciga, S.A., Wendland, J.R., Tung, J.Y.,  
186 Hinds, D.A., Perlis, R.H., and Winslow, A.R. (2016). Identification of 15 genetic loci  
187 associated with risk of major depression in individuals of European descent. *Nat Genet*  
188 48, 1031-1036. 10.1038/ng.3623.
- 189 6. Barkley-Levenson, A.M., Lagarda, F.A., and Palmer, A.A. (2018). Glyoxalase 1 (GLO1)  
190 Inhibition or Genetic Overexpression Does Not Alter Ethanol's Locomotor Effects:  
191 Implications for GLO1 as a Therapeutic Target in Alcohol Use Disorders. *Alcohol Clin*  
192 *Exp Res* 42, 869-878. 10.1111/acer.13623.

- 193 7. Distler, M.G., Plant, L.D., Sokoloff, G., Hawk, A.J., Aneas, I., Wuenschell, G.E., Termini,  
194 J., Meredith, S.C., Nobrega, M.A., and Palmer, A.A. (2012). Glyoxalase 1 increases  
195 anxiety by reducing GABAA receptor agonist methylglyoxal. *J Clin Invest* 122, 2306-  
196 2315. 10.1172/JCI61319.
- 197 8. Henn, B.M., Hon, L., Macpherson, J.M., Eriksson, N., Saxonov, S., Pe'er, I., and  
198 Mountain, J.L. (2012). Cryptic distant relatives are common in both isolated and  
199 cosmopolitan genetic samples. *PLoS One* 7, e34267. 10.1371/journal.pone.0034267.
- 200 9. Sanchez-Roige, S., Fontanillas, P., Elson, S.L., 23andMe Research Team, Pandit, A.,  
201 Schmidt, E.M., Foerster, J.R., Abecasis, G.R., Gray, J.C., de Wit, H., et al. (2018).  
202 Genome-wide association study of delay discounting in 23,217 adult research  
203 participants of European ancestry. *Nat Neurosci* 21, 16-18. 10.1038/s41593-017-0032-x.
- 204 10. Sanchez-Roige, S., Fontanillas, P., Jennings, M.V., Bianchi, S.B., Huang, Y., Hatoum,  
205 A.S., Sealock, J., Davis, L.K., Elson, S.L., 23andMe Research Team, and Palmer, A.A.  
206 (2021). Genome-wide association study of problematic opioid prescription use in  
207 132,113 23andMe research participants of European ancestry. *Mol Psychiatry* 26, 6209-  
208 6217. 10.1038/s41380-021-01335-3.
- 209 11. Sanchez-Roige, S., Jennings, M.V., Thorpe, H.H.A., Mallari, J.E., van der Werf, L.C.,  
210 Bianchi, S.B., Huang, Y., Lee, C., Mallard, T.T., Barnes, S.A., et al. (2023). *CADM2* is  
211 implicated in impulsive personality and numerous other traits by genome- and phenome-  
212 wide association studies in humans and mice. *Transl Psychiatry* 13, 167.  
213 10.1038/s41398-023-02453-y.
- 214 12. Sanchez-Roige, S., Palmer, A.A., Fontanillas, P., Elson, S.L., 23andMe Research Team,  
215 Substance Use Disorder Working Group of the Psychiatric Genomics Consortium,  
216 Adams, M.J., Howard, D.M., Edenberg, H.J., Davies, G., et al. (2019). Genome-Wide  
217 Association Study Meta-Analysis of the Alcohol Use Disorders Identification Test

218 (AUDIT) in Two Population-Based Cohorts. *Am J Psychiatry* 176, 107-118.  
219 10.1176/appi.ajp.2018.18040369.

220 13. Fuchsberger, C., Abecasis, G.R., and Hinds, D.A. (2015). minimac2: faster genotype  
221 imputation. *Bioinformatics* 31, 782-784. 10.1093/bioinformatics/btu704.

222 14. Lee, S.H., Goddard, M.E., Wray, N.R., and Visscher, P.M. (2012). A better coefficient of  
223 determination for genetic profile analysis. *Genet Epidemiol* 36, 214-224.  
224 10.1002/gepi.21614.

225 15. Substance Abuse and Mental Health Services Administration. (2023). Results from the  
226 2022 National Survey on Drug Use and Health: Detailed tables.

227 16. Hasin, D.S., Kerridge, B.T., Saha, T.D., Huang, B., Pickering, R., Smith, S.M., Jung, J.,  
228 Zhang, H., and Grant, B.F. (2016). Prevalence and Correlates of DSM-5 Cannabis Use  
229 Disorder, 2012-2013: Findings from the National Epidemiologic Survey on Alcohol and  
230 Related Conditions-III. *Am J Psychiatry* 173, 588-599. 10.1176/appi.ajp.2015.15070907.

231 17. Pruim, R.J., Welch, R.P., Sanna, S., Teslovich, T.M., Chines, P.S., Gliedt, T.P.,  
232 Boehnke, M., Abecasis, G.R., and Willer, C.J. (2010). LocusZoom: regional visualization  
233 of genome-wide association scan results. *Bioinformatics* 26, 2336-2337.  
234 10.1093/bioinformatics/btq419.

235 18. Pasmán, J.A., Verweij, K.J.H., Gerring, Z., Stringer, S., Sanchez-Roige, S., Treur, J.L.,  
236 Abdellaoui, A., Nivard, M.G., Baselmans, B.M.L., Ong, J.S., et al. (2018). GWAS of  
237 lifetime cannabis use reveals new risk loci, genetic overlap with psychiatric traits, and a  
238 causal influence of schizophrenia. *Nat Neurosci* 21, 1161-1170. 10.1038/s41593-018-  
239 0206-1.

240 19. Levey, D.F., Galimberti, M., Deak, J.D., Wendt, F.R., Bhattacharya, A., Koller, D.,  
241 Harrington, K.M., Quaden, R., Johnson, E.C., Gupta, P., et al. (2023). Multi-ancestry  
242 genome-wide association study of cannabis use disorder yields insight into disease



243 biology and public health implications. *Nat Genet* 55, 2094-2103. 10.1038/s41588-023-  
244 01563-z.  
245
